# Supplementary material for: Evaluation of human risks of surface and groundwater contaminated withCd and Pb south of El-Minya Governorate, Egypt
Source: Copernicus journal article supplement (doi:10.5194/dwes-2018-37), 2018-12-19
Supplement: Supplementary file [file dwes-2018-37-AC5-supplement.pdf]

# **Evaluation of human risks of surface water and groundwater contaminated with Cd and Pb south of El-Minya Governorate, Egypt.**

Salman A. Salman<sup>1</sup>, Ahmed A. Asmoay<sup>1</sup>, Amr El-Gohary<sup>1</sup>, Hassan Sabet<sup>2</sup>

<sup>1</sup> Geological Sciences Dep. National Research Centre, Dokki, Giza, 12622, Egypt.

<sup>2</sup> Geology Dep., Faculty of Science, Al-Azhar University, Cairo, Egypt.

*Correspondence to:* Ahmed A. Asmoay (asmoay@gmail.com)

## **Abstract:**

Water pollution with cadmium (Cd) and lead (Pb) has worldwide concern because of their health impact. Evaluation of their concentrations and potential human health risks of surface and groundwater south El-Minya Governorate, Egypt is the main aim of the study. Fifty-five samples were collected; 30 samples surface water and 25 samples groundwater. The samples were analyzed using Atomic Absorption Spectrometry (AAS) to determine Cd and Pb contents. The heavy metals levels in both of surface and groundwater exceeded the maximum allowable level for drinking water which set by World Health Organization (WHO). The hazard quotient (HQ) showed that the surface water and the groundwater may pose a health risk to residents, especially the children, primarily due to the high Cd and Pb content. The pollution returns to human activities. The water can be recommended for irrigation, not for drinking.

## **1. Introduction**

Water pollution resource has becoming a worldwide problem. To protect the environment and public health, it is important to have precise knowledge of concentrations and type of water pollutants, especially heavy metals. Because the heavy metals have long biological half-life, they are threatening the human health in case of excessive concentrations

1 (Albji et al., 2013). Cadmium and lead are of the most chemical pollutants that threaten the  
2 water quality for different uses. Because of their harmful effects, persistence, identification  
3 and monitoring of their concentrations in water are of critical importance for protecting  
4 ecological and human health (Osei et. al., 2010; Nazar, et. al., 2012).

5 Cadmium has a major environmental concern and ranked as the sixth significant  
6 human health hazard toxic substances (ATSDR, 1997). It is released into the aqueous system  
7 from metal plating, smelting, mining, cadmium-nickel batteries, phosphate fertilizers, paint  
8 industries, pigments and alloy industries as well as from sewage (Kadirvalu and  
9 Namasivayam, 2003). The nervous system appears to be the most sensitive target of Cd  
10 toxicity. Cadmium exposure can produce a wide variety of acute and chronic effects in  
11 humans such as renal failure, lung insufficiency, bone lesions and hypertension (Gupta and  
12 Bhattacharyya, 2007; Sun and Li, 2011).

13 Lead is used in many industries including lead smelting and processing, batteries  
14 manufacture, pigments, solder, plastics, cable sheathing, ammunition and ceramics. It was the  
15 most common environmental contaminant (Chiang et. al, 2012; Fischbein, 1998). Water and  
16 soil contaminated with lead pose serious human health risks with global dimensions (Tong et.  
17 al., 2000; Brooks et. al., 2010). Lead does not undergo degradation or decomposition. Thus,  
18 its long persistence in the environment exacerbates its threat to human health. Lead absorbed  
19 by human body disturbs many processes and is harmful to many organs and tissues such as  
20 heart, bones and nervous systems (Needleman, 2004; Bruce et. al., 2012). Fumes from lead-  
21 based paints, automobile exhaust, polluted air of industrial plants and cigarette smoke may all  
22 contain lead, therefore, products containing lead are now prohibited (Moreira and Moreira,  
23 2004). Due to urbanization, lead and other metals are regularly discharged into fields, water  
24 and soils through sewage sludge (Abreu et al., 1998).

1            Depending on their concentration, heavy metals can result in a wide range of toxic  
2 effects on humans, plants, animals, and microbes (Caliza et al., 2012; Qu et al., 2012).  
3 Quantify both of carcinogenic risks for Cd and non-carcinogenic risk for Cd and Pb to  
4 children and adults is important. Human risk assessment methodologies are well developed  
5 and documented in lots of investigations by taking into consideration exposure scenarios of  
6 metal intake through contaminated water (Muhammad et al., 2011; Shah et al., 2012; Dou and  
7 Li, 2012). The hazard quotients (HQ) of the USEPA (1989) are extensively used to  
8 characterize the non-carcinogenic health effects of toxic metals by comparison of their  
9 exposure effects to a reference dose (RfD) (Qu et al., 2012).

10            The objective of the present study is to assess the health risk for cadmium and lead in  
11 the surface water and the groundwater systems in the western part of the River Nile between  
12 Abu Qurqas and Dyer Mawas districts, El-Minya Governorate, Egypt.

## 15            **2. Material and Methods**

### 16            **2.1. Location**

17            The study area occupied the middle part of the Nile Valley between longitudes 30° 29'  
18 and 30° 54'E and latitudes 27° 37' and 27° 56'N (Fig. 1). It is bounded by the River Nile from  
19 the east and the calcareous plateau at the west between Abu Qurqas northward and Dyer  
20 Mawas at the south. The water resources in the study area are represented by the River Nile,  
21 canals and drains as well as groundwater (Fig. 1). The River Nile passes through high eastern  
22 and western calcareous plateaus with a general slope from south to north about 0.1 m/km  
23 (Korany et al 2006). The stratigraphic succession in El-Minya area is represented by Tertiary  
24 and Quaternary sedimentary rocks (Fig. 2). The distribution of the different rock units was

1 indicated in Said (1981). The stratigraphic sequence is built up from base to top as follow:  
2 Middle Eocene limestone intercalated with shale (Samalut Formation); Pliocene  
3 undifferentiated sands, clays, and conglomerates; Plio-Pleistocene sand and gravel with clay  
4 and shale lenses; Pleistocene sand and gravel with clay lenses and Holocene silt and clay. The  
5 main aquifer in the study area is represented by Pleistocene sediments which compose of sand  
6 and gravel of different sizes with some clay intercalation. The thickness of this aquifer ranged  
7 from 25 to 300 m from desert fringes to central Nile Valley (Sadek 2001). The aquifer is  
8 underlined by impermeable Pliocene clay layer and overlain by semi-permeable silty clay  
9 layer. The semi-confined bed (silty clay) is missed outside the floodplain and the aquifer  
10 becomes unconfined westward in the desert fringes. The groundwater flows generally from  
11 the southern part to the northern part of the study area. Locally, the groundwater flows from  
12 the center outwards in all directions; therefore, the River Nile is a recharge zone. The aquifer  
13 is recharged by Nile water, irrigation system, drains, agricultural infiltration and vertical  
14 upward from the deeper saline aquifers (Korany, 1984).

15  
16 In November 2014, thirty water samples were collected from surface water resources  
17 at the study area (Fig. 1 and Table. 1). In addition, 25 groundwater samples were collected  
18 from the Quaternary aquifer (Fig. 1). Pre-rinsed polypropylene bottles were filled with the  
19 samples, sealed tightly. At lab, the samples were filtered through filter paper (Whatman No.  
20 42) and digested with nitric acid (APHA, 1995). Samples were analyzed using atomic  
21 absorption spectrometer instrument (model: Perkin Elmer 400) in National Research Centre  
22 Laboratories.

23 For health risk assessment, chronic daily intake (CDI, mg/kg/day) and hazard quotient  
24 (HQ) for each contaminant was calculated according to the following equations (Eq. 1, 2, 3)  
25 adopted by Kelepertzis (2014):

1

$$\text{CDI} = \text{C} * \text{IR} * \text{ED} * \text{EF} / \text{BW} * \text{AT} \quad (1)$$

2

$$\text{HQ}_{\text{non-carcinogenic}} = \text{CDI} / \text{RfD} \quad (2)$$

3

$$\text{HQ}_{\text{carcinogenic}} = \text{CDI} * \text{SF} \quad (3)$$

4

5 where, C, IR, ED, EF, BW, AT and RfD represent the concentration of metal in water (mg/L),  
6 average daily intake rate (2 L/day for adult and 1.2 L/day for children), exposure duration (15  
7 years), exposure frequency (350 days), body weight (70kg for adult and 28kg for children),  
8 average time (ED\*365 days for non-carcinogenic and lifetime\*365 for carcinogenic risk) and  
9 toxicity reference dose. According to USEPA (2011) the RfD for Cd and Pb are 0.0005 and  
10 0.055 mg/kg/day respectively. Also, slope factor (SF) for Cd and Pb are 0.38 and 0.055  
11 mg/kg/day respectively. The average lifetime for an adult is 65 years and 6.5 years for  
12 children (USEPA, 2011).

13

### 14 **3. Results and Discussion**

#### 15 **3.1. Surface water**

16 River Nile and its tributaries (canals and drains) are the main source of water in Egypt  
17 especially for the governorates allocated on the river banks and on its branches. Therefore, the  
18 quality of water was evaluated by measuring of Cd and Pb concentrations in the south of El-  
19 Minya Governorate during 2014 (Table 2). Cadmium concentrations (Table 2), ranged from 1  
20 to 48µg/l, exceed the permissible limit (3µg/l) for drinking water according to WHO (2011).  
21 Excess Cd could accumulate in the kidney and remains for many years causes irreversible  
22 kidney damage (Goyer, 1996). Patients with kidney failure patients in the study area are  
23 presumed to have increased from 10 patient/million in 1974 to about 165 patient/million in  
24 1995 and in 2005 it was 260 patient/million in El-Minya Governorate (El Minshawy and

1 Kamel, 2006). Agricultural activities are considered as the most important sources for Cd,  
2 where the Egyptian marine phosphorite used for the manufacture of super-phosphate  
3 fertilizers contains up to 20 ppm Cd (El-Kammar, 1974). Pesticides also can lead to high Cd  
4 content in the study area (Bowen, 1966).

5 The highest concentration of Cd was recorded in sample number S<sub>8</sub> of 48µg/l close to  
6 Abu Qurqas Sugar factory due to the deposition of human wastes or garbage (Al-Shiekh Sharf  
7 canal). The lower concentration was recorded in sample number S<sub>6</sub> (1µg/l) which was  
8 collected from the River Nile. These results are in line with those obtained Toufeek (2011)  
9 who recorded average Cd concentration 12.5 µg/l at Aswan (southern Egypt), while Salman  
10 (2013) found that the Cd level in samples collected from Sohag Governorate was flocculated  
11 around 16µg/l. Therefore, Osman and Kloas (2010) mentioned that the average Cd  
12 concentration in the River Nile at Assuit was 6 µg/l.

13 Lead concentration ranged from 54 to 329µg/l in the studied surface water samples  
14 (Table. 2). The study samples content of Pb passes the permissible limit (10µg/l) for drinking  
15 water according to WHO (2011). Lead adsorbed by human body disturbs many body  
16 processes and is harmful to many organs and tissues such as heart, bones, nervous system  
17 (Needleman, 2004; Bruce et al., 2012). The highest concentration of Pb was recorded in  
18 sample number S<sub>28</sub> (329µg/l) from Al-Nasriyah canal, while sample number S<sub>6</sub>, which was  
19 collected from the River Nile at Abu Qurqas district, contains the lowest concentration  
20 (54µg/l). These results are in agreement with those obtained by Toufeek (2011) who reported  
21 about 214µg/l Pb in the River Nile at Aswan. In addition, Osman and Kloas (2010) proved  
22 that the average Pb concentration in the River Nile at Assuit is nearly 24µg/l.

23 The Nile River and canals contain higher Cd and Pb concentrations than the drains  
24 indicating the role of the human activities as the main source of these metals because most of

1 the canals penetrate settlements and adjacent to roads. In addition, most of the houses have  
2 not sewers and discharge their wastewater and solid waste into canals.

### 3.2. Groundwater

5 Groundwater is the second water resource in the study area and the only water  
6 resource in the desert fringes. It is used for irrigation and for domestic and drinking in some  
7 villages. The groundwater samples exhibit a relative wide range of the Cd level varying from  
8 2 to 49 $\mu\text{g/l}$  with mean value 24 $\mu\text{g/l}$  (Table 3). The groundwater Cd level decreased eastward  
9 (Fig. 3) due to mixing with the surface water from River Nile and the role of the silty clay  
10 layer in the adsorption of Cd and prevent it to reach the aquifers. However, there are three hot  
11 spots of Cd resulted from the intensive human activities and fuel stations. Cd hot spot in the  
12 NW part of the study area adjacent to the western desert road is vulnerable as a result of the  
13 unconfined condition of the aquifers.

14 Also, the measured Pb content of the analyzed groundwater samples show a relative  
15 wide range varying from 90 to 410 $\mu\text{g/l}$  with an average of 242 $\mu\text{g/l}$  (Table. 3). The marked  
16 high level of Pb content implies that the anthropogenic activities are the main source of Pb.  
17 The results are in agreement with Melegy et al (2014) who mentioned that Cd and Pb  
18 concentration in the groundwater of Sohag were around 21 and 383  $\mu\text{g/l}$ , respectively. In  
19 addition, Salman (2013) reported that the average of Cd and Pb concentrations are 21 and  
20 383 $\mu\text{g/l}$  respectively in the Quaternary aquifer at Sohag. Pb level in the groundwater of the  
21 study area was increased at Abu Qurqas district resulting from the effect of the sugar factory,  
22 cesspits and fuel stations (Fig. 4).

23 All the samples are unsuitable for drinking purpose where they possess Cd and Pb  
24 values above the permissible limit of 3 $\mu\text{g/l}$  for Cd and 15  $\mu\text{g/l}$  for Pb (WHO, 2011). On the  
25 other hand, surface water and groundwater are suitable for irrigation purposes according to

1 NAS- NAE (1973), where they contain less than 10000 and 5000000 $\mu\text{g}/\text{l}$  of Cd and Pb,  
2 respectively. But unfortunately, using the groundwater for drinking in some villages of the  
3 study area represents a serious health impact. El-Minshawy and Kamel (2006) mentioned that  
4 the use of unsafe water for drinking contributes up to 71.8% of the renal failure in the study  
5 area.

### 6 **3.3. Health risk assessment**

7 It was observed that general population in the rural area is using surface water from  
8 the rivers or canals and groundwater from hand pumps for drinking and domestic purposes  
9 because they don't have access to the tap water from the tube wells. Therefore, health risk  
10 assessment (HQ) for surface water and groundwater was carried out in this study. The results  
11 of non-carcinogenic and carcinogenic health risks (HQ) due to metal exposure in surface  
12 water and groundwater samples are provided in Tables (4) and (5).

13 The non-carcinogenic health risk values for Cd in the drinking surface water for adults  
14 vary from 0.05 to 2.06 with an average of 1.30 and for children fluctuate between 0.08 and  
15 3.95 with mean 1.96 (Table 4). The Pb values for adults range from 0.03 to 0.16 with mean  
16 0.11 and for children extend between 0.04 and 0.25 with an average of 0.17 (Table 4). While,  
17 the values of the non-carcinogenic health risk of Cd in the drinking groundwater for adults  
18 range from 0.11 to 2.68 with an average of 1.29 and for children extend between 0.16 and  
19 4.03 averaging 1.94 (Table 5). The Pb values for adults range from 0.04 to 0.20 with an  
20 average of 0.12 and for children vary from 0.07 to 0.31 averaging 0.18 (Table 5). According  
21 to USEPA (2011), Cd and Pb values of non-carcinogenic health risk should not exceed 1 to be  
22 considered as non-harmful drinking water.

23 The carcinogenic health risk values for Cd in the drinking surface water for adults  
24 range from  $0.17 \times 10^{-4}$  to  $7.9 \times 10^{-4}$  with an average of  $3.9 \times 10^{-4}$  and for children extend between  
25  $0.1 \times 10^{-5}$  and  $4.8 \times 10^{-3}$  with mean  $2.3 \times 10^{-3}$  (Table 4). The Pb values for adults vary from



1 6.2\*10<sup>-3</sup> to 37\*10<sup>-3</sup> with mean 26\*10<sup>-3</sup> and for children range from 3.7\*10<sup>-2</sup> to 22\*10<sup>-2</sup> with an  
2 average 15\*10<sup>-2</sup> (Table 4). As well, the Cd values of carcinogenic health risk for the drinking  
3 groundwater range from 4.8\*10<sup>-6</sup> to 1.2\*10<sup>-4</sup> averaging 5.66\*10<sup>-5</sup> for adults and from 2.9\*10<sup>-5</sup>  
4 to 7.11\*10<sup>-4</sup> with an average of 3.42\*10<sup>-4</sup> for children (Table 5). Pb values for adults fluctuate  
5 between 3.13\*10<sup>-5</sup> and 14.3\*10<sup>-5</sup> with an average of 8.41\*10<sup>-5</sup>, also, the results for children  
6 vary from 1.67\*10<sup>-9</sup> to 86.1\*10<sup>-5</sup> averaging 48.5\*10<sup>-5</sup> (Tables 5). According to USEPA  
7 (2011), the values of Cd and Pb of carcinogenic health risk should not exceed 10<sup>-6</sup> which it is  
8 the safe limit of the hazard quotient. More than this limit, the drinking water has very harmful  
9 effects on the inhabitants.

#### 11 **4. Conclusion**

12 Cadmium and lead contents of the studied samples from Nile River, its tributaries  
13 (canals and drains) and groundwater exceed the permissible limits for drinking water and  
14 could be disturbing many body processes and are harmful to many organs and tissues such as  
15 the heart, bones, kidney and nervous system. The canals are higher in Cd and Pb  
16 concentrations than the drains indicating the role of the human activities as the main source of  
17 these metals because most of the canals penetrate settlements and adjacent to roads. The  
18 lowest concentrations of Cd and Pb were recorded in samples which were collected from the  
19 River Nile.

20 The non-carcinogenic health risk of Cd values exceeds 1 which is the safe limit of the  
21 hazard quotient indicating harmful drinking water while the Pb values do not pass that limit.  
22 The values of Cd and Pb of carcinogenic health risk exceed the safe limit of the hazard  
23 quotient and accordingly, the drinking water has very harmful effects on the inhabitants.

24 The water resources in the study area (surface water and groundwater) are suitable for  
25 irrigation purposes. Source of pollution in the investigated area was derived from

1 anthropogenic activities such as industries, agriculture, mining and sewage. The water in the  
2 concerned area is suitable to use for irrigation purpose and unsuitable for drinking. The water  
3 needs to the treatment to be used for drinking purposes.

#### 4 **Recommendations**

5 It is recommended to connect the houses in different rural parts of the study area with  
6 safe drinking water lines with regular monitoring of water resources and the end user water  
7 lines.

#### 9 **Acknowledgments**

10 The authors gratefully acknowledge the National Research Centre for funding this  
11 research as a Ph.D. internal project and the grant no. is (8/5/9) to support Mr. Ahmed A.  
12 Asmoay to do the lab work.

### 14 **5. References**

- 15 Abreu, C. A., Abreu, M. F., and Andrade, J. C.: Distribution of lead in the soil profile  
16 evaluated by DTPA and Mehlich-3 solutions. *Bragantia*, 57: 185-192,1998.
- 17 Albaji, A., Ziarati, P., and Shiralipour, R.: Mercury and Lead contamination study of drinking  
18 Water in Ahavz, Iran. *International Journal of Farming and Applied Sciences*, 1(19), 751-  
19 755, 2013.
- 20 APHA.: Standard methods for the examination of water and wastewater. American Public  
21 Health Association, 19<sup>th</sup> ed., Washington, D C: 1467p, 1995.
- 22 ATSDR.: Toxicological profile for Cadmium. Agency for Toxic Substances and Disease  
23 Registry: 430p, 1997.
- 24 Bowen, D.: Quaternary geology. Pergamon, Oxford: 221p, 1966.

- 1 Brooks, R. M., Bahadory, M., Tovia, F., and Rostami, H. N.: "Removal of Lead from  
2 Contaminated Water". *International Journal of Soil, Sediment, & Water*, 3 (2), 1-14, 2010.
- 3 Bruce, S. G., Zarema, A., and Igor, M. G.: Analysis of Lead toxicity in human cells. *BMC*  
4 *Genomics*, 13:344, 2012.
- 5 Caliza, J., Montserrat, G., Martíb, E., Sierrab, J., Cruañasb, R., Garaub, M. A., Triadó-  
6 Margarita, X., and Vilaa, X.: The exposition of a calcareous Mediterranean soil to toxic  
7 concentrations of Cr, Cd and Pb produces changes in the microbiota mainly related to  
8 differential metal bioavailability. *Chemosphere*, 89, 494–504, 2012.
- 9 Chiang, Y. W., Santos, R. M., Ghyselbrecht, K., Cappuyns, V., Martens, J. A., Swennen, R.,  
10 Gerven, T. V., and Meesschaert, B.: Strategic selection of an optimal sorbent mixture for  
11 in-situ remediation of heavy metal contaminated sediments: Framework and case study. *J*  
12 *Environmental Management*, 105, 1- 11, 2012.
- 13 Dou, M., and Li, C.: Health risk assessment of Cadmium pollution emergency. *Energy*  
14 *Procedia*, 16, 290-295, 2012.
- 15 El -Kashouty, M.: Modeling of limestone aquifer in the western part of the River Nile  
16 between Beni Suef and El-Minia. *Arab J Geosci*, 6, 55–76, 2013.
- 17 Elewa, A. M. T., El-Sayed, E., El-Kashouty, M., and Morsi, M.: Quantitative study of surface  
18 and groundwater systems in the western part of the River Nile, Minia Governorate, Upper  
19 Egypt: Water Quality in Relation to Anthropogenic Activities. *Greener Journal of Physical*  
20 *Sciences*, 3 (6), 212-228, 2013.
- 21 El-Kammar, A.: Comparative mineralogical and geochemical study on some Egyptian  
22 phosphorities from Nile Valley, Qussier area and Kharga Oasis, Egypt. Ph. D. Thesis,  
23 Cairo Univ: 425 p, 1974.
- 24 El-Minshawy, O., and Kamel, E. G.: Renal replacement therapy and increased risk of  
25 cardiovascular. *Egypt. J Hosp Med*, 22: 29-38, 2006.

1 Fischbein, A.: Occupational and environmental exposure to Lead,” In: W N Rom, Ed,  
2 Environmental and Occupational Medicine, 3rd Edition, Lippincott-Raven, Philadelphia:  
3 973-996, 1998.

4 Goyer, R. A.: Toxic effects of metals: mercury. In Casarett and Duoll's toxicology. The Basic  
5 Science of Poisons, 5<sup>th</sup>ed (Klassen CD, ed), McGraw-Hill, New York, NY, 709-712, 1996.

6 Gupta, S. S., Bhattacharyya, G. K.: Influence of acid activation of kaolinite and  
7 montmorillonite on adsorptive removal of Cd (II) from water, Industrial & Engineering  
8 Chemistry Research, 46 (11), 3734-3742, 2007.

9 Kadirvalu, K., and Namasivayam, C.: Activated carbon from coconut coirpith as metal  
10 adsorbent: Adsorption of Cd (II) from Aqueous Solution. Advances in Environmental  
11 Research, 7 (4), 471, 2003.

12 Kelepertzis, E.: Investigating the sources and potential health risks of environmental  
13 contaminants in the soils and drinking waters from the rural clusters in Thiva area  
14 (Greece). Ecotoxicology and Environmental Safety. 100, 258–265, 2014.

15 Korany, E., Sakr, S., Darwish, M, and Morsy, S.: Hydrogeologic modeling for the assessment  
16 of continuous rise of groundwater levels in the quaternary aquifer, Nile valley, Egypt: case  
17 study. Inter Conf Geol Arab World (GAW8), Cairo University, 703-711, 2006.

18 Korany, E.: Statstical approach in the assessment of the geohydrologic profiles. 9<sup>th</sup> Intern  
19 Congr Statist Compu Sci Social and emogr Res, Cairo, Ain Shams University Press, 161-  
20 176, 1984.

21 Melegy, A. A., Shaban, A. M., Hassaan, M. M., and Salman, S. A.: Geochemical  
22 Mobilization of Some Heavy Metals in Water Resources and Their Impact on Human  
23 Health in Sohag Governorate, Egypt. Arabian Journal of Geosciences, 7, 4541 – 4552,  
24 2014.

- 1           Moreira, F. R., and Moreira, J. C.: Effects of Lead exposure on the human body and health  
2           implications. *Revista Panamericana de Salud Pública*, 15: 119-129, 2004.
- 3           Muhammad, S., Shah, M. T., and Khan, S.: Health risk assessment of heavy metals and their  
4           source apportionment in drinking water of Kohistan region, northern Pakistan. *MicroChem*  
5           *J*, 98, 334–343, 2011.
- 6           NAS-NAE.: Water quality criteria. Report prepared by committee of water quality on request  
7           of U.S. Environmental Protection Agency. National Academy of Science and National  
8           Academy of Engineering, Washington, D C, USA: 594p, 1973.
- 9           Nazar, R., Iqbal, N., Masood, A., Iqbal, M., Khan, R., Syeed, S., and Khan, N. A.: Cadmium  
10           toxicity in plants and role of mineral nutrients in Its Alleviation. *American Journal of Plant*  
11           *Sciences*, 3, 1476-1489, 2012.
- 12           Needleman, H.: Lead poisoning. *Annual Review Medicine*, 55: 209-222, 2004.
- 13           Osei, J., Nyame, F. K., Armah, T. K., Osa, S. K., Dampare, S. B., Fianko, J. R., Adomako,  
14           D., and Bentil, N.: Application of multivariate analysis for identification of pollution  
15           sources in the Densu Delta Wetland in the vicinity of a Landfill site in Ghana. *J Water*  
16           *Resource and Protection*, 2: 1020-1029, 2010.
- 17           Osman, A. G. M., and Kloas, W.: 2010. Water quality and heavy metal monitoring in water,  
18           sediments, and tissues of the African Catfish *Clarias gariepinus* (Burchell, 1822) from the  
19           River Nile, Egypt. *J Environmental Protection*, 1, 389-400, 2010.
- 20           Qu, C. S., Ma, Z. W., Yang, J., Liu, Y., Bi, J., and Huang, L.: Human exposure pathways of  
21           heavy metals in lead-zinc mining area, Jiangsu Province, China. *PLoS One*, 7 (11),  
22           e46793, 2012.
- 23           Sadek, M.: Isotopic criteria for upward leakage in the alluvial aquifer in north El Minia district,  
24           Egypt. *Egypt. Geol Surv and Mining Authority*, 19 p, 2001.
- 25           Said, R.: Geological evaluation of the Nile; *Springer-Verlag, NY*, Berlin: 151p, 1981.

- 1 Salman, S. A.: Geochemical and environmental studies on the territories west River Nile,  
2 Sohag Governorate, Egypt. Ph. D. Thesis, Al-Azhar Univ., 2013.
- 3 Shah, T., Ara, J., Muhammad, S., Khan, S., and Tariq, S.: Health risk assessment via surface  
4 water and subsurface water consumption in the mafic and ultra-mafic terrain, Mohmand  
5 agency, Northern Pakistan. *J Geochemical Exploration*, 118, 60-67, 2012.
- 6 Sun, H., and Li, L.: Investigation of distribution for trace Lead and Cadmium in chinese  
7 herbal medicines and their decoctions by graphite furnace Atomic Absorption  
8 Spectrometry. *American Journal of Analytical Chemistry*, 2, 217-222, 2011.
- 9 Tong, S., Schirnding, Y. E. V., and Prapamontol, T.: Environmental Lead exposure: A public  
10 health problem of global dimensions. *Bulletin of the World Health Organization*, 78: 1068-  
11 1077, 2000.
- 12 Toufeek, M. E. F.: 2011. Distribution of Cadmium and Lead in Aswan reservoir and River  
13 Nile water at Aswan. *World Applied Sci J*, 13 (2), 369 – 375, 2011.
- 14 USEPA.: Risk Assessment Guidance for Superfund. United States Environmental Protection  
15 Agency: EPA/540/1-89/002, 1989.
- 16 USEPA.: Exposure Factors Handbook. United States Environmental Protection Agency,  
17 Washington, D C: EPA/600/R-09/052F, 2011.
- 18 WHO.: Guideline for drinking water quality. World Health Organization, 4<sup>th</sup> Ed: 564p, 2011.
- 19

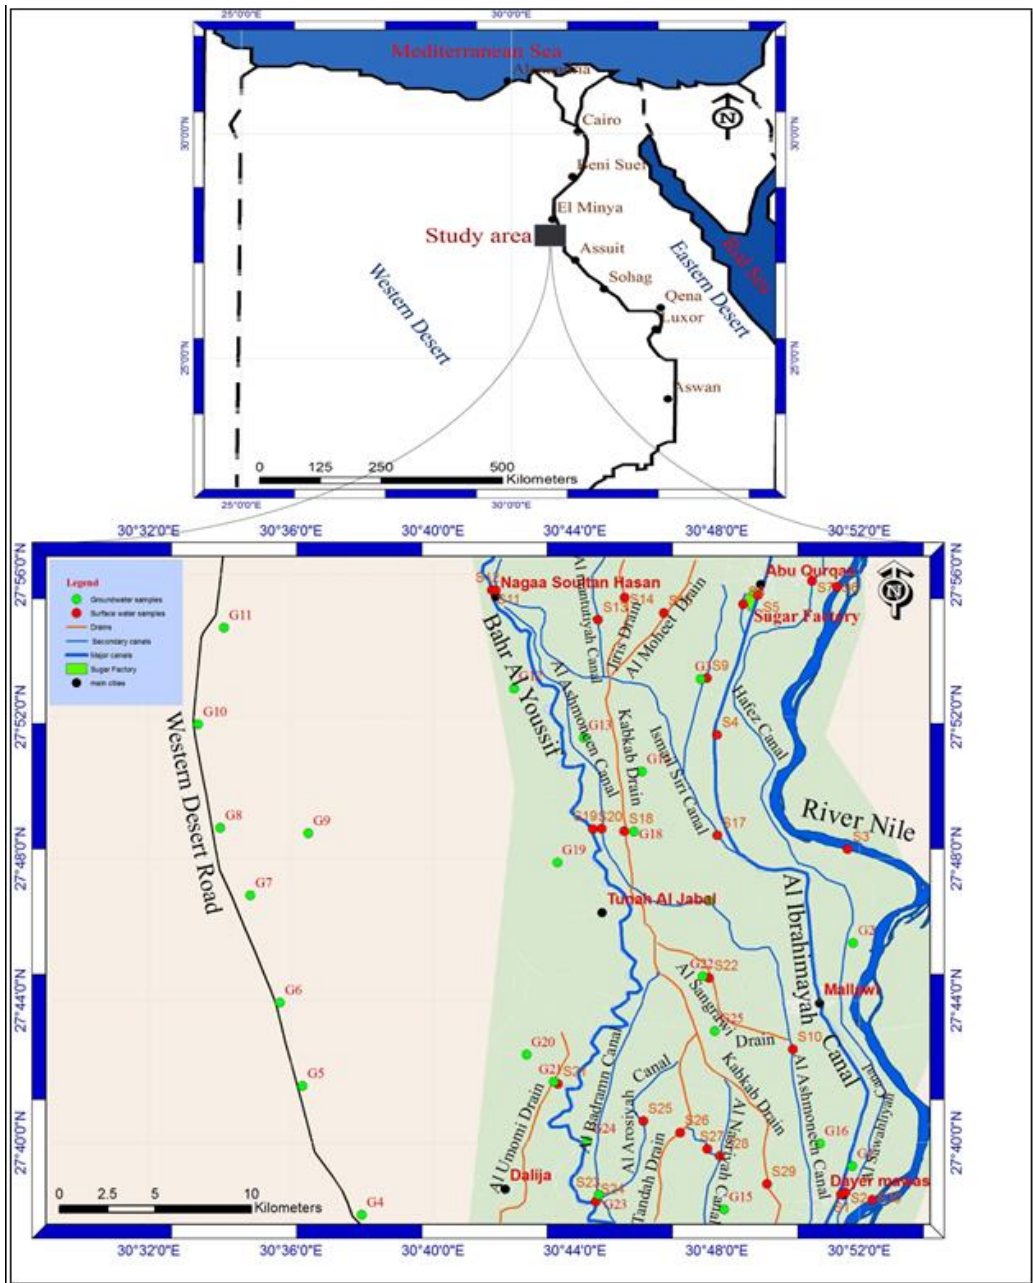

Figure 1: Location map of the study area.

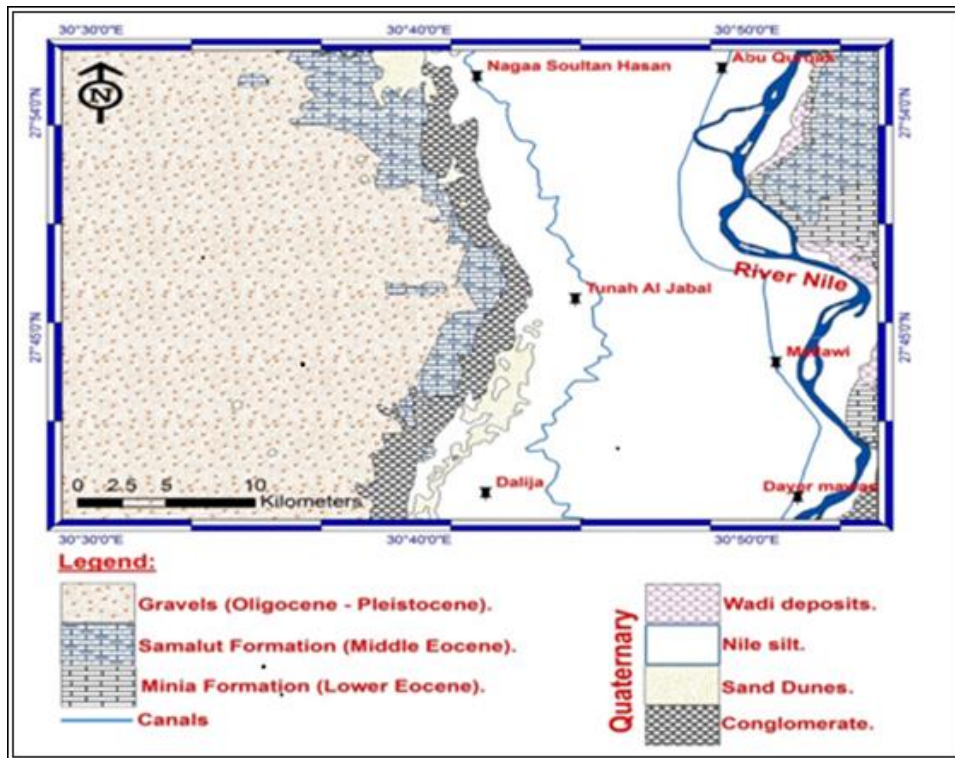

Figure 2: Geologic map of the study area.

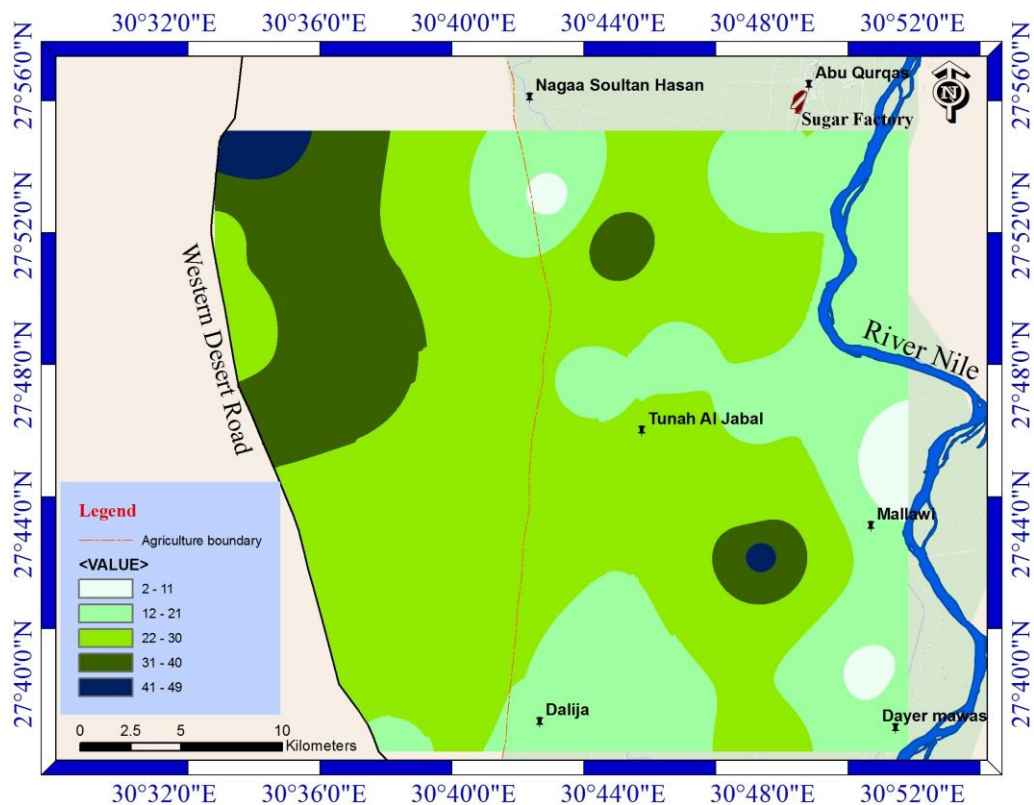

Figure 3: Spatial distribution map of Cd in the studied groundwater samples.



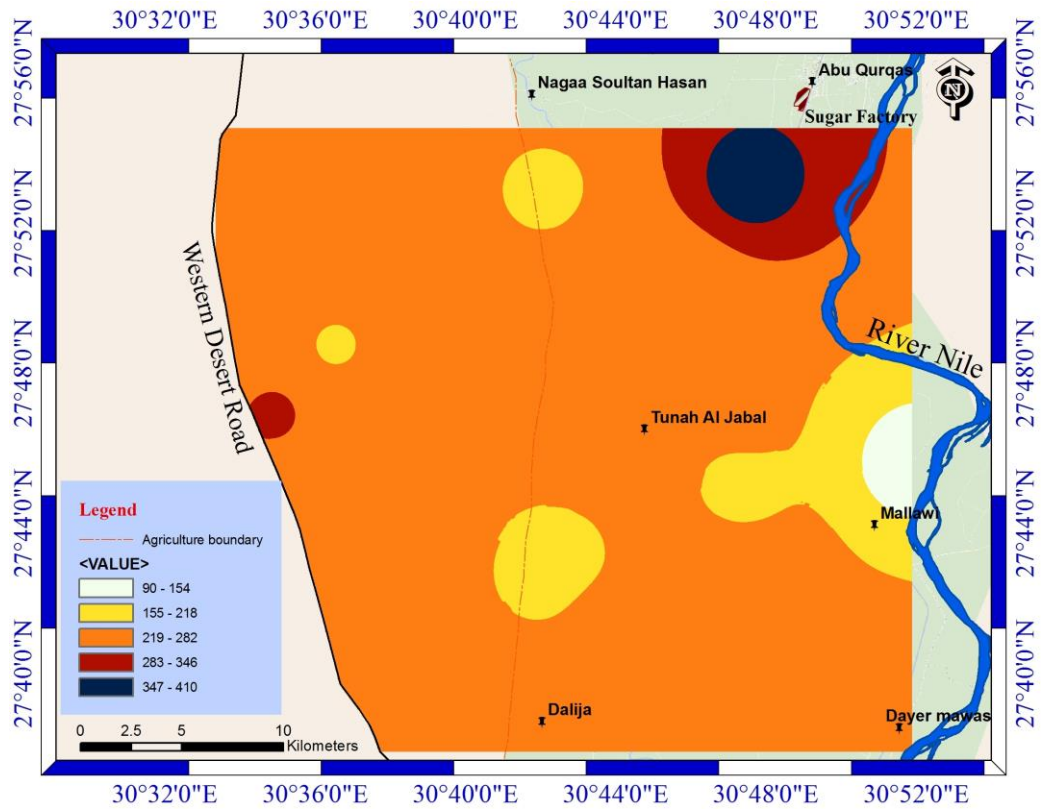

Figure 4: Spatial distribution map of Pb in the studied groundwater samples.

Table 1: Surface water samples and localities.

| Sample No.                                          | Canals                | Sample No.                        | Canals & Drains               |
|-----------------------------------------------------|-----------------------|-----------------------------------|-------------------------------|
| S <sub>3</sub> , S <sub>6</sub> , S <sub>30</sub>   | River Nile            | S <sub>28</sub>                   | Al Nasriyah canal             |
| S <sub>1</sub> , S <sub>5</sub>                     | Al Ibrahimayah canals | S <sub>9</sub>                    | Branch from Ismail Siri canal |
| S <sub>11</sub> , S <sub>20</sub> , S <sub>24</sub> | Bahr Youssef          | S <sub>27</sub>                   | Branch from Al Nasriyah canal |
| S <sub>2</sub>                                      | Al Sawahliyah canals  | S <sub>4</sub>                    | Al Sellic Drain               |
| S <sub>7</sub>                                      | Hafez canal           | S <sub>14</sub>                   | Jiris Drain                   |
| S <sub>8</sub>                                      | Al ShiekhSharf canal  | S <sub>15</sub>                   | Al Moheet Drain               |
| S <sub>10</sub> , S <sub>16</sub> , S <sub>19</sub> | Al Ashmoneen canal    | S <sub>18</sub> , S <sub>29</sub> | Kabkab Drain                  |
| S <sub>12</sub> , S <sub>17</sub>                   | Ismail Siri canal     | S <sub>21</sub>                   | Al umomi Drain                |
| S <sub>13</sub>                                     | Al Mantutiyah canal   | S <sub>22</sub>                   | Al Sangrawi Drain             |
| S <sub>23</sub>                                     | Al Badraman canal     | S <sub>26</sub>                   | Tandah Drain                  |
| S <sub>25</sub>                                     | Al Arosiyah canal     |                                   |                               |

**Table 2: Cd and Pb concentrations in the surface water samples (µg/l).**

| Sample No.      | Nile & Canals |     | Drains |     | Sample No.      | Nile & Canals |     | Drains |     |
|-----------------|---------------|-----|--------|-----|-----------------|---------------|-----|--------|-----|
|                 | Cd            | Pb  | Cd     | Pb  |                 | Cd            | Pb  | Cd     | Pb  |
| S <sub>1</sub>  | 39            | 184 | -      | -   | S <sub>18</sub> | -             | -   | 17     | 216 |
| S <sub>2</sub>  | 37            | 210 | -      | -   | S <sub>19</sub> | 15            | 208 | -      | -   |
| S <sub>3</sub>  | 22            | 270 | -      | -   | S <sub>20</sub> | 15            | 208 | -      | -   |
| S <sub>4</sub>  | -             | -   | 22     | 222 | S <sub>21</sub> | -             | -   | 28     | 183 |
| S <sub>5</sub>  | 19            | 241 | -      | -   | S <sub>22</sub> | -             | -   | 21     | 260 |
| S <sub>6</sub>  | 1             | 54  | -      | -   | S <sub>23</sub> | 33            | 275 | -      | -   |
| S <sub>7</sub>  | 19            | 96  | -      | -   | S <sub>24</sub> | 21            | 250 | -      | -   |
| S <sub>8</sub>  | 48            | 288 | -      | -   | S <sub>25</sub> | 7             | 272 | -      | -   |
| S <sub>9</sub>  | 9             | 209 | -      | -   | S <sub>26</sub> | -             | -   | 22     | 273 |
| S <sub>10</sub> | 20            | 222 | -      | -   | S <sub>27</sub> | 16            | 298 | -      | -   |
| S <sub>11</sub> | 19            | 268 | -      | -   | S <sub>28</sub> | 35            | 329 | -      | -   |
| S <sub>12</sub> | 43            | 262 | -      | -   | S <sub>29</sub> | -             | -   | 23     | 198 |
| S <sub>13</sub> | 28            | 303 | -      | -   | S <sub>30</sub> | 28            | 192 | -      | -   |
| S <sub>14</sub> | -             | -   | 42     | 234 | Mean            | 24            | 233 | 23     | 224 |
| S <sub>15</sub> | -             | -   | 12     | 213 | Median          | 21            | 245 | 22     | 219 |
| S <sub>16</sub> | 32            | 225 | -      | -   | Min.            | 1             | 54  | 12     | 183 |
| S <sub>17</sub> | 22            | 261 | -      | -   | Max.            | 48            | 329 | 42     | 273 |

**Table 3: Cd and Pb concentrations ( $\mu\text{g/l}$ ) in the study groundwater samples.**

| Sample No.      | Cd | Pb  | Sample No.      | Cd | Pb  |
|-----------------|----|-----|-----------------|----|-----|
| G <sub>1</sub>  | 15 | 249 | G <sub>15</sub> | 24 | 274 |
| G <sub>2</sub>  | 2  | 90  | G <sub>16</sub> | 8  | 242 |
| G <sub>3</sub>  | 19 | 410 | G <sub>17</sub> | 19 | 228 |
| G <sub>4</sub>  | 20 | 224 | G <sub>18</sub> | 19 | 228 |
| G <sub>5</sub>  | 26 | 252 | G <sub>19</sub> | 19 | 243 |
| G <sub>6</sub>  | 23 | 242 | G <sub>20</sub> | 28 | 162 |
| G <sub>7</sub>  | 36 | 296 | G <sub>21</sub> | 14 | 266 |
| G <sub>8</sub>  | 25 | 230 | G <sub>22</sub> | 27 | 193 |
| G <sub>9</sub>  | 39 | 213 | G <sub>23</sub> | 17 | 275 |
| G <sub>10</sub> | 29 | 229 | G <sub>24</sub> | 19 | 264 |
| G <sub>11</sub> | 49 | 254 | G <sub>25</sub> | 42 | 276 |
| G <sub>12</sub> | 9  | 197 | Mean            | 24 | 242 |
| G <sub>13</sub> | 38 | 270 | Minimum         | 2  | 90  |
| G <sub>14</sub> | 23 | 242 | Maximum         | 49 | 410 |

**Table 4: Statistical parameters of non-carcinogenic and carcinogenic health risks for surface water samples.**

| Parameter | Non-carcinogenic for Adults |                      | Non-carcinogenic for Children |                      |
|-----------|-----------------------------|----------------------|-------------------------------|----------------------|
|           | HQ Cd                       | HQ Pb                | HQ Cd                         | HQ Pb                |
| Minimum   | 0.05                        | 0.03                 | 0.08                          | 0.04                 |
| Maximum   | 2.06                        | 0.16                 | 3.95                          | 0.25                 |
| Average   | 1.30                        | 0.11                 | 1.96                          | 0.17                 |
| Parameter | Carcinogenic for Adults     |                      | Carcinogenic for Children     |                      |
|           | HQ Cd                       | HQ Pb                | HQ Cd                         | HQ Pb                |
| Minimum   | $0.17 \times 10^{-4}$       | $6.2 \times 10^{-3}$ | $0.1 \times 10^{-5}$          | $3.7 \times 10^{-2}$ |
| Maximum   | $7.9 \times 10^{-4}$        | $37 \times 10^{-3}$  | $4.8 \times 10^{-3}$          | $22 \times 10^{-2}$  |
| Average   | $3.9 \times 10^{-4}$        | $26 \times 10^{-3}$  | $2.3 \times 10^{-3}$          | $15 \times 10^{-2}$  |

HQ = Hazard quotient;  $\text{HQ}_{\text{non-carcinogenic}} = \text{CDI} / \text{RfD}$ ;  $\text{HQ}_{\text{carcinogenic}} = \text{CDI} / \text{SF}$

**Table 5: Statistical parameters of non-carcinogenic and carcinogenic health risks for groundwater samples.**

| Parameter | Non-carcinogenic for Adults |                       | Non-carcinogenic for Children |                       |
|-----------|-----------------------------|-----------------------|-------------------------------|-----------------------|
|           | HQ Cd                       | HQ Pb                 | HQ Cd                         | HQ Pb                 |
| Minimum   | 0.11                        | 0.04                  | 0.16                          | 0.07                  |
| Maximum   | 2.68                        | 0.20                  | 4.03                          | 0.31                  |
| Average   | 1.29                        | 0.12                  | 1.94                          | 0.18                  |
| Parameter | Carcinogenic for Adults     |                       | Carcinogenic for Children     |                       |
|           | HQ Cd                       | HQ Pb                 | HQ Cd                         | HQ Pb                 |
| Minimum   | $4.8 \times 10^{-6}$        | $3.13 \times 10^{-5}$ | $2.9 \times 10^{-5}$          | $1.67 \times 10^{-9}$ |
| Maximum   | $1.2 \times 10^{-4}$        | $14.3 \times 10^{-5}$ | $7.11 \times 10^{-4}$         | $86.1 \times 10^{-5}$ |
| Average   | $5.66 \times 10^{-5}$       | $8.41 \times 10^{-5}$ | $3.42 \times 10^{-4}$         | $48.5 \times 10^{-5}$ |

HQ = Hazard quotient;       $HQ_{\text{non-carcinogenic}} = \text{CDI} / \text{RfD}$ ;       $HQ_{\text{carcinogenic}} = \text{CDI} / \text{SF}$
