# Supplementary material for: Evaluation of human risks of surface and groundwater contaminated withCd and Pb south of El-Minya Governorate, Egypt
Source: Copernicus journal article supplement (doi:10.5194/dwes-2018-37), 2018-12-19
Supplement: Supplementary file [file dwes-2018-37-AC7-supplement.pdf]

# **Evaluation of human risks of surface water and groundwater contaminated with Cd and Pb south of El-Minya Governorate, Egypt.**

Salman A. Salman<sup>1</sup>, Ahmed A. Asmoay<sup>1</sup>, Amr El-Gohary<sup>1</sup>, Hassan Sabet<sup>2</sup>

<sup>1</sup> Geological Sciences Dep. National Research Centre, Dokki, Giza, 12622, Egypt.

<sup>2</sup> Geology Dep., Faculty of Science, Al-Azhar University, Cairo, Egypt.

*Correspondence to:* Ahmed A. Asmoay (asmoay@gmail.com)

## **Abstract:**

Water pollution with cadmium (Cd) and lead (Pb) has worldwide concern because of their health impact. Determination of their concentrations and potential human health risks in surface and groundwater at south El-Minya Governorate, Egypt is the main aim of this study. Fifty-five samples were collected; 30 samples surface water and 25 samples groundwater. The samples were analyzed using Atomic Absorption Spectrometry (AAS) to determine Cd and Pb contents. Their levels in surface and groundwater exceeded the maximum allowable level for drinking water which set by WHO. The hazard quotient (HQ) showed that the surface and groundwater may be pose health risk to residents, especially the children. However, the water can be used safely for irrigation.

## **1. Introduction**

Water resources pollution was becoming a worldwide problem. To protect the environment and public health, it is important to have precise knowledge on concentration and type of water pollutants especially heavy metals. Because the heavy metals have long biological half-life, they are threat the human health in case of excessive concentrations (Albji et al., 2013). Cd and Pb are of the most chemical pollutants that threaten the water quality for different uses. Monitoring of their concentrations in water is of critical importance for

1 protecting ecological and human health, because of their harmful effects and persistence  
2 (Nazar, et. al., 2012).

3 Cadmium has a major environmental concern and ranked as the sixth significant  
4 human health hazard toxic substances (ATSDR, 1997). It is released into the aqueous system  
5 from metal plating, smelting, mining, cadmium-nickel batteries, phosphate fertilizers, paint  
6 industries, pigments and alloy industries as well as from sewage (Kadirvalu and  
7 Namasivayam, 2003). The nervous system appears to be the most sensitive target of Cd  
8 toxicity. Cadmium exposure can produce a wide variety of acute and chronic effects in  
9 humans such as renal failure, lung insufficiency, bone lesions and hypertension (Sun and Li,  
10 2011).

11 Pb is the most common environmental contaminant (Chiang et. al, 2012). It doesn't  
12 undergo degradation or decomposition. Thus, its long persistence in the environment  
13 exacerbates its threat to human health. Pb is used in many industries including lead smelting  
14 and processing, batteries manufacture, pigments, solder, plastics, cable sheathing, fuel,  
15 ammunition and ceramics. Due to urbanization, Pb and other metals are regularly discharge  
16 into fields, water and soils through sewage sludge, urban runoff and automobile exhaust  
17 (Elnazer et al. 2015). Pb absorbed by human body disturbs many processes and is harmful to  
18 many organs such as heart, bones and nervous systems (Bruce et. al., 2012).

19 The application of human health risk assessment model has many advantages than  
20 comparison with drinking water guidelines as WHO guideline. Because, it takes in  
21 consideration the age, body weight, metal concentration, exposure duration and daily intake.  
22 So, quantifying human risk (carcinogenic and non-carcinogenic risks) of Cd and Pb to  
23 children and adults is important issue. The hazard quotient (HQ) of the USEPA (1989) is  
24 extensively used to characterize the carcinogenic and non-carcinogenic health effects of toxic  
25 metals by comparison of their exposure effects to a reference dose (RfD) (Qu et al., 2012). It

1 was documented in many investigations by taking into consideration exposure scenarios of  
2 metal intake through contaminated water (Muhammad et al., 2011; Shah et al., 2012; Dou and  
3 Li, 2012). So, the objective of the present study is the determination of Cd and Pb  
4 concentrations and potential human health risks in the surface and the ground water systems  
5 in the western part of the River Nile between Abu Qurqas and Dyer Mawas districts, south El-  
6 Minya Governorate, Egypt.

## 8 **2. Material and methods**

### 9 **2.1. Location**

10 The study area occupied the middle part of the Nile Valley between longitudes 30° 29'  
11 and 30° 54'E and latitudes 27° 37'and 27° 56'N (Fig. 1). It is bounded by the River Nile from  
12 the east and the calcareous plateau at the west between Abu Qurqas northward and Dyer  
13 Mawas at the south. The water resources in the study area are represented by the River Nile,  
14 canals and drains as well as groundwater (Fig. 1). The stratigraphic succession (Fig. 2) in El-  
15 Minya area is represented by Tertiary and Quaternary sedimentary rocks (Said 1981). The  
16 main aquifer in the study area is represented by Pleistocene sediments which compose of sand  
17 and gravel of different sizes with some clay intercalation (Sadek 2001). The aquifer is semi-  
18 confined in the old cultivated land (at the eastern part of the study area) and unconfined in the  
19 desert fringes (at the western part of the study area). The groundwater flows generally from  
20 the southern part to the northern part of the study area. The aquifer is recharged by Nile water,  
21 irrigation system, drains, agricultural infiltration and vertical upward from the deeper saline  
22 aquifers (Abdalla et al. 2009). The main sources of water for different purposes in the study  
23 area are Nile, canals, drains and groundwater. The study area contains many industrial zones,  
24 agricultural activities and urban areas.

## 2.2. Sampling and analyses

In November 2014, thirty water samples were collected from surface water resources at the study area (Fig. 1 and Table. 1). In addition, 25 groundwater samples were collected from the Quaternary aquifer (Fig. 1). Pre-rinsed polypropylene bottles were filled with the samples sealed tightly, acidified (pH < 2) with nitric acid to prevent precipitation, microbial activity and sorption losses to container walls. At lab the samples were filtered through filter paper (Whatman No. 42) and digested with nitric acid (APHA, 1995). Samples were analyzed using atomic absorption spectrometer instrument (model: Perkin Elmer 400) in National Research Centre Laboratories.

For health risk assessment, non-carcinogenic ( $HQ_{nc}$ ) and carcinogenic ( $HQ_c$ ) hazard quotient for each contaminant was calculated according to the following equations (Kelepertzis 2014):

$$HQ_{nc} = CDI / RfD \quad (1)$$

$$HQ_c = CDI * SF \quad (2)$$

$$CDI = C * IR * ED * EF / BW * AT \quad (3)$$

where CDI, C, IR, ED, EF, BW, AT and RfD represent chronic daily intake (mg/kg/day), concentration of metal in water (mg/L), average daily intake rate (2 L/day for adult and 1.2 L/day for children), exposure duration (15 years), exposure frequency (350 days), body weight (70kg for adult and 28kg for children), average time (ED\*365 days for non-carcinogenic and lifetime\*365 for carcinogenic risk) and toxicity reference dose. According to USEPA (2011) the RfD for Cd and Pb is 0.0005 and 0.055 mg/kg/day respectively and slope factor (SF) is 0.38 and 0.055 mg/kg/day respectively. The average life time for adult is 65 years and 6.5 years for children.

### 3. Results and discussion

#### 3.1. Surface water

River Nile and its tributaries (canals and drains) are the main source of water in Egypt especially for the governorates allocated on the river banks and on its branches. Cadmium concentrations (Table 2), ranged from 1 to 48 $\mu\text{g/l}$ , exceed the permissible limit (3 $\mu\text{g/l}$ ) for drinking water according to WHO (2011). Excess Cd could accumulate in the kidney and remains for many years causes irreversible kidney damage (Goyer, 1996). The kidney patients in the study area is presumed to have increased from 10 patient/million in 1974 to about 165 patient/million in 1995 and in 2005 it was 260 patient/million in El-Minya Governorate (El-Minshawy and Kamel, 2006). The highest concentration of Cd was recorded in sample number S<sub>8</sub> of 48 $\mu\text{g/l}$  close to Abu Qurqas Sugar factory (Al-Shiekh Sharf canal). The lower concentration was recorded in sample number S<sub>6</sub> (1 $\mu\text{g/l}$ ) which was collected from the River Nile. These results are in line with those obtained Toufeek (2011) who recorded average Cd concentration 12.5  $\mu\text{g/l}$  at Aswan (southern Egypt), while Melegy et al. (2014) found that the Cd level in samples collected from Sohag Governorate were flocculated around 16 $\mu\text{g/l}$ . Osman and Kloas (2010) mentioned that the average Cd concentration in the River Nile at Assuit was 6  $\mu\text{g/l}$ .

Lead concentration ranged from 54 to 329 $\mu\text{g/l}$  in the studied surface water samples (Table. 2). The study samples content of Pb passes the permissible limit (10 $\mu\text{g/l}$ ) for drinking water according to WHO (2011). Lead adsorbed by human body disturbs many body processes and is harmful to many organs and tissues such as heart, bones, nervous system (Bruce et al., 2012). The highest concentration of Pb was recorded in sample number S<sub>28</sub> (329 $\mu\text{g/l}$ ) from Al-Nasriyah canal, while sample number S<sub>6</sub>, which was collected from the River Nile at Abu Qurqas district, contains the lowest concentration (54 $\mu\text{g/l}$ ). These results are in agreement with those obtained by Toufeek (2011) who reported about 214 $\mu\text{g/l}$  Pb in the

1 River Nile at Aswan. In addition, Osman and Kloas (2010) proved that the average Pb  
2 concentration in the River Nile at Assuit is nearly 24 $\mu$ g/l.

3 Agricultural activities are considered as the most important source for Cd and Pb,  
4 where the used super-phosphate fertilizers in the study area contain about 8.5 and 16 ppm Cd  
5 and Pb, respectively (Asmoay 2017). In addition, vehicle exhaust, industrial activities and  
6 urban runoff contribute to great extent in the pollution of water with these metals (Elnazer et  
7 al. 2018). The River Nile and canals contain higher Cd and Pb concentrations than the  
8 agricultural drains owing to the presence of these canals penetrating urban areas, closed to  
9 roads and industrial areas.

### 11 **3.2. Groundwater**

12 Groundwater is the second important water resources in the study area and it used for  
13 irrigation as well as for domestic and drinking in desert fringes and some villages which  
14 doesn't have drinking water network. The groundwater samples exhibit relative wide range of  
15 the Cd level varying from 2 to 49 $\mu$ g/l with mean value 24 $\mu$ g/l (Table 3). The groundwater Cd  
16 level decreased eastward (Fig. 3) due to mixing with the surface water from River Nile and  
17 the role of the silty clay layer in the adsorption of Cd and prevent it to reach the aquifers.  
18 However, there are three hot spots of Cd resulted from the intensive human activities and fuel  
19 stations. Cd hot spot in the NW part of the study area adjacent to the western desert road is  
20 vulnerable as a result of the unconfined condition of the aquifers.

21 Also, the measured Pb content of the analyzed groundwater samples show relative  
22 wide range varying from 90 to 410 $\mu$ g/l with an average of 242 $\mu$ g/l (Table. 3). The marked  
23 high level of Pb content implies that the anthropogenic activities (agricultural and urban  
24 runoff) are the main source of Pb. The results are in agreement with Melegy et al (2014) who  
25 mentioned that Cd and Pb concentration in the groundwater of Sohag were around 21 and 383

1  $\mu\text{g/l}$ , respectively. Pb level in the groundwater of the study area was increased at Abu Qurqas  
2 district resulting from the effect of the sugar factory, cesspits and fuel stations (Fig. 4).

3 All the samples are unsuitable for drinking purpose where they possess Cd and Pb  
4 values above the permissible limit of  $3\mu\text{g/l}$  for Cd and  $10\mu\text{g/l}$  for Pb (WHO, 2011). On the  
5 other hand, surface and ground water are suitable for irrigation purposes according to NAS-  
6 NAE (1973), where they contain less than 10000 and  $5000000\mu\text{g/l}$  of Cd and Pb, respectively.  
7 But unfortunately, using the groundwater for drinking in some villages of the study area  
8 represents serious health impact.

### 10 **3.3. Health risk assessment**

11 Water from the River Nile and canals as well as groundwater is used for drinking and  
12 domestic purposes. Unfortunately, the applied treatment techniques (flocculation and  
13 coagulation with alum) in drinking water stations (Donia 2007) in the study area are  
14 ineffective for the removal of toxic metals (Fatoki and Ogunfowokan 2002). It was observed,  
15 too, that great number of residents in rural areas use groundwater from hand pumps for  
16 drinking because they don't have access to the tap water. El-Minshawy and Kamel (2006)  
17 mentioned that the use of unsafe water for drinking contributes up to 71.8% of the renal  
18 failure in the study area. Therefore, health risk assessment surface water and groundwater was  
19 carried out in this study. The results of  $HQ_{nc}$  and  $HQ_c$  due to metal exposure in surface water  
20 and groundwater samples are provided in Tables (4) and (5).

21 The calculated  $HQ_{nc}$  average values for Cd in surface water for adults and children  
22 were 1.30 and 1.96, respectively while;  $HQ_{nc}$  average values for Pb were 0.11 and 0.17 (Table  
23 4). On the other hand, the calculated  $HQ_{nc}$  average values for Cd in groundwater for adults  
24 and children were 1.29 and 1.94, respectively while;  $HQ_{nc}$  average values for Pb were 0.12  
25 and 0.18 (Table 5). According to USEPA (2011), Cd can cause non-carcinogenic health

1 problems because its  $HQ_{nc}$  values were more than 1. While Pb presence in water hasn't  
2 adverse health impacts ( $HQ_{nc}<1$ ), however its concentration exceeded WHO (2011)  
3 guidelines.

4 The calculated  $HQ_c$  values for Cd in the surface water for adults range from  $0.17*10^{-4}$   
5 to  $7.9*10^{-4}$  and for children from  $0.1*10^{-5}$  to  $4.8*10^{-3}$  (Table 4). The calculated  $HQ_c$  values  
6 for Pb varied from  $6.2*10^{-3}$  to  $37*10^{-3}$  for adults and varied from  $3.7*10^{-2}$  to  $22*10^{-2}$  for  
7 children (Table 4). While, the calculated  $HQ_c$  values for Cd in the groundwater ranged from  
8  $4.8*10^{-6}$  to  $1.2*10^{-4}$  for adults and from  $2.9*10^{-5}$  to  $7.11*10^{-4}$  for children (Table 5). the  
9 calculated  $HQ_c$  values for Pb varied between  $3.13*10^{-5}$  and  $14.3*10^{-5}$  for adults and varied  
10 from  $1.67*10^{-9}$  to  $86.1*10^{-5}$  for children (Tables 5). According to USEPA (2011)  
11 recommenden value ( $HQ_c<10^{-6}$ ) the studied surface and groundwater consumption could  
12 cause carcinogenic health risks in adults and children.

#### 14 **4. Conclusion**

15 Cadmium and lead contents of the studied samples from River Nile, canals and drains  
16 as well as groundwater exceed the permissible limits for drinking water and could be  
17 disturbing many adverse health impacts. The calculated  $HQ_{nc}$  indicted the health hazards of  
18 the presence of Cd in water resources in the study area in opposite to the presence of Pb. This  
19 result supports the importance of application of health risk assessment model than the  
20 comparison with drinking water guidelines. Unfortunately, the presence of Cd and Pb in  
21 surface and groundwater of the study area have carcinogenic health impacts. The water  
22 resources in the study area (surface and groundwater) are suitable for irrigation purposes.  
23 Source of pollution in the investigated area were derived from anthropogenic activities such  
24 as industries, agriculture, mining and urban runoff.



1 It is recommended to apply effective treatment agents for removing toxic metals in  
2 drinking water stations, connect the houses in rural parts of the study area with safe drinking  
3 water lines and regular monitoring of water resources and the end user water lines.  
4

## 5 **Acknowledgments**

6 The authors gratefully acknowledge the National Research Centre for funding this  
7 research as a Ph.D. internal project and the grant no. is (8/5/9) to support Mr. Ahmed A.  
8 Asmoay to do the lab work.  
9

## 10 **5. References**

- 11 Abdalla, F.A., Ahmed, A.A. and Omer, A.A.: Degradation of groundwater quality of  
12 quaternary aquifer at Qena, Egypt. *J. Environ. Studies* 1, 19-32, 2009.
- 13 Albaji, A., Ziarati, P., and Shiralipour, R.: Mercury and Lead contamination study of drinking  
14 Water in Ahavz, Iran. *International Journal of Farming and Applied Sciences*, 1(19), 751-  
15 755, 2013.
- 16 APHA.: Standard methods for the examination of water and wastewater. American Public  
17 Health Association, 19<sup>th</sup> ed., Washington, D C: 1467p, 1995.
- 18 Asmoay A.S.A: Hydrogeochemical Studies on the Water Resources and Soil Characteristics  
19 in the Western Bank of the River Nile between Abu Qurqas and Dayr Mawas, El Minya  
20 Governorate, Egypt. Ph.D. thesis, Fac Sci, Al-Azhar Univ, Egypt, 2017.
- 21 ATSDR.: Toxicological profile for Cadmium. Agency for Toxic Substances and Disease  
22 Registry: 430p, 1997.
- 23 Bruce, S. G., Zarema, A., and Igor, M. G.: Analysis of Lead toxicity in human cells. *BMC*  
24 *Genomics*, 13:344, 2012.

1 Chiang, Y. W., Santos, R. M., Ghyselbrecht, K., Cappuyns, V., Martens, J. A., Swennen, R.,  
2 Gerven, T. V., and Meesschaert, B.: Strategic selection of an optimal sorbent mixture for  
3 in-situ remediation of heavy metal contaminated sediments: Framework and case study. *J*  
4 *Environmental Management*, 105, 1- 11, 2012.

5 Donia, N.: Survey of Potable Water Quality Problems in Egypt. Eleventh International Water  
6 Tech. Conf., IWTC11 Sharm El-Sheikh, Egypt, 1049-1058, 2007.

7 Dou, M., and Li, C.: Health risk assessment of Cadmium pollution emergency. *Energy*  
8 *Procedia*, 16, 290-295, 2012.

9 El-Minshawy, O., and Kamel, E. G.: Renal replacement therapy and increased risk of  
10 cardiovascular. *Egypt. J Hosp Med*, 22: 29-38, 2006.

11 Elnazer, A.A., Mostafa, A., Salman S.A., Seleem, E.M. and Al-Gamal, A.G.: Temporal and  
12 spatial evaluation of the River Nile water quality between Qena and Sohag Cities, Egypt.  
13 *Bulletin of the National Research Centre*. /doi.org/10.1186/s42269-018-0005-6, 2018.

14 Elnazer, A.A., Salman, S.A., Seleem, E.M. and Abu El Ella, E.M.: Assessment of Some  
15 Heavy Metals Pollution and Bioavailability in Roadside Soil of Alexandria-Marsa Matruh  
16 Highway, Egypt. *International Journal of Ecology*, 2015, Article ID 689420, 7 pages,  
17 doi:10.1155/2015/689420, 2015.

18 Fatoki, O.S. and Ogunfowokan, A.O.: Effect of coagulant treatment on the metal composition  
19 of raw water. *Water SA* 28(3): 293-297, 2002.

20 Goyer, R. A.: Toxic effects of metals: mercury. In Casarett and Duoll's toxicology. *The Basic*  
21 *Science of Poisons*, 5<sup>th</sup>ed (Klassen CD, ed), McGraw-Hill, New York, NY, 709-712, 1996.

22 Kadirvalu, K., and Namasivayam, C.: Activated carbon from coconut coirpith as metal  
23 adsorbent: Adsorption of Cd (II) from Aqueous Solution. *Advances in Environmental*  
24 *Research*, 7 (4), 471, 2003.

- 1 Kelepertzis, E.: Investigating the sources and potential health risks of environmental  
2 contaminants in the soils and drinking waters from the rural clusters in Thiva area  
3 (Greece). *Ecotoxicology and Environmental Safety*. 100, 258–265, 2014.
- 4 Melegy, A. A., Shaban, A. M., Hassaan, M. M., and Salman, S. A.: Geochemical  
5 Mobilization of Some Heavy Metals in Water Resources and Their Impact on Human  
6 Health in Sohag Governorate, Egypt. *Arabian Journal of Geosciences*, 7, 4541 – 4552,  
7 2014.
- 8 Muhammad, S., Shah, M. T., and Khan, S.: Health risk assessment of heavy metals and their  
9 source apportionment in drinking water of Kohistan region, northern Pakistan. *MicroChem*  
10 *J*, 98, 334–343, 2011.
- 11 NAS-NAE.: Water quality criteria. Report prepared by committee of water quality on request  
12 of U.S. Environmental Protection Agency. National Academy of Science and National  
13 Academy of Engineering, Washington, D C, USA: 594p, 1973.
- 14 Nazar, R., Iqbal, N., Masood, A., Iqbal, M., Khan, R., Syeed, S., and Khan, N. A.: Cadmium  
15 toxicity in plants and role of mineral nutrients in Its Alleviation. *American Journal of Plant*  
16 *Sciences*, 3, 1476-1489, 2012.
- 17 Osman, A. G. M., and Kloas, W.: 2010. Water quality and heavy metal monitoring in water,  
18 sediments, and tissues of the African Catfish *Clarias gariepinus* (Burchell, 1822) from the  
19 River Nile, Egypt. *J Environmental Protection*, 1, 389-400, 2010.
- 20 Qu, C. S., Ma, Z. W., Yang, J., Liu, Y., Bi, J., and Huang, L.: Human exposure pathways of  
21 heavy metals in lead-zinc mining area, Jiangsu Province, China. *PLoS One*, 7 (11),  
22 e46793, 2012.
- 23 Sadek, M.: Isotopic criteria for upward leakage in the alluvial aquifer in north El Minia district,  
24 Egypt. *Egypt. Geol Surv and Mining Authority*, 19 p, 2001.
- 25 Said, R.: Geological evaluation of the Nile; *Springer-Verlag, NY*, Berlin: 151p, 1981.

1 Shah, T., Ara, J., Muhammad, S., Khan, S., and Tariq, S.: Health risk assessment via surface  
2 water and subsurface water consumption in the mafic and ultra-mafic terrain, Mohmand  
3 agency, Northern Pakistan. *J Geochemical Exploration*, 118, 60-67, 2012.

4 Sun, H., and Li, L.: Investigation of distribution for trace Lead and Cadmium in chinese  
5 herbal medicines and their decoctions by graphite furnace Atomic Absorption  
6 Spectrometry. *American Journal of Analytical Chemistry*, 2, 217-222, 2011.

7 Toufeek, M.E.F.: Distribution of Cadmium and Lead in Aswan reservoir and River Nile water  
8 at Aswan. *World Applied Sci J*, 13 (2), 369 – 375, 2011.

9 USEPA: Exposure Factors Handbook. United States Environmental Protection Agency,  
10 Washington, D C: EPA/600/R-09/052F, 2011.

11 USEPA: Risk Assessment Guidance for Superfund. United States Environmental Protection  
12 Agency: EPA/540/1-89/002, 1989.

13 WHO: Guideline for drinking water quality. World Health Organization, 4th Ed: 564p, 2011.  
14  
15

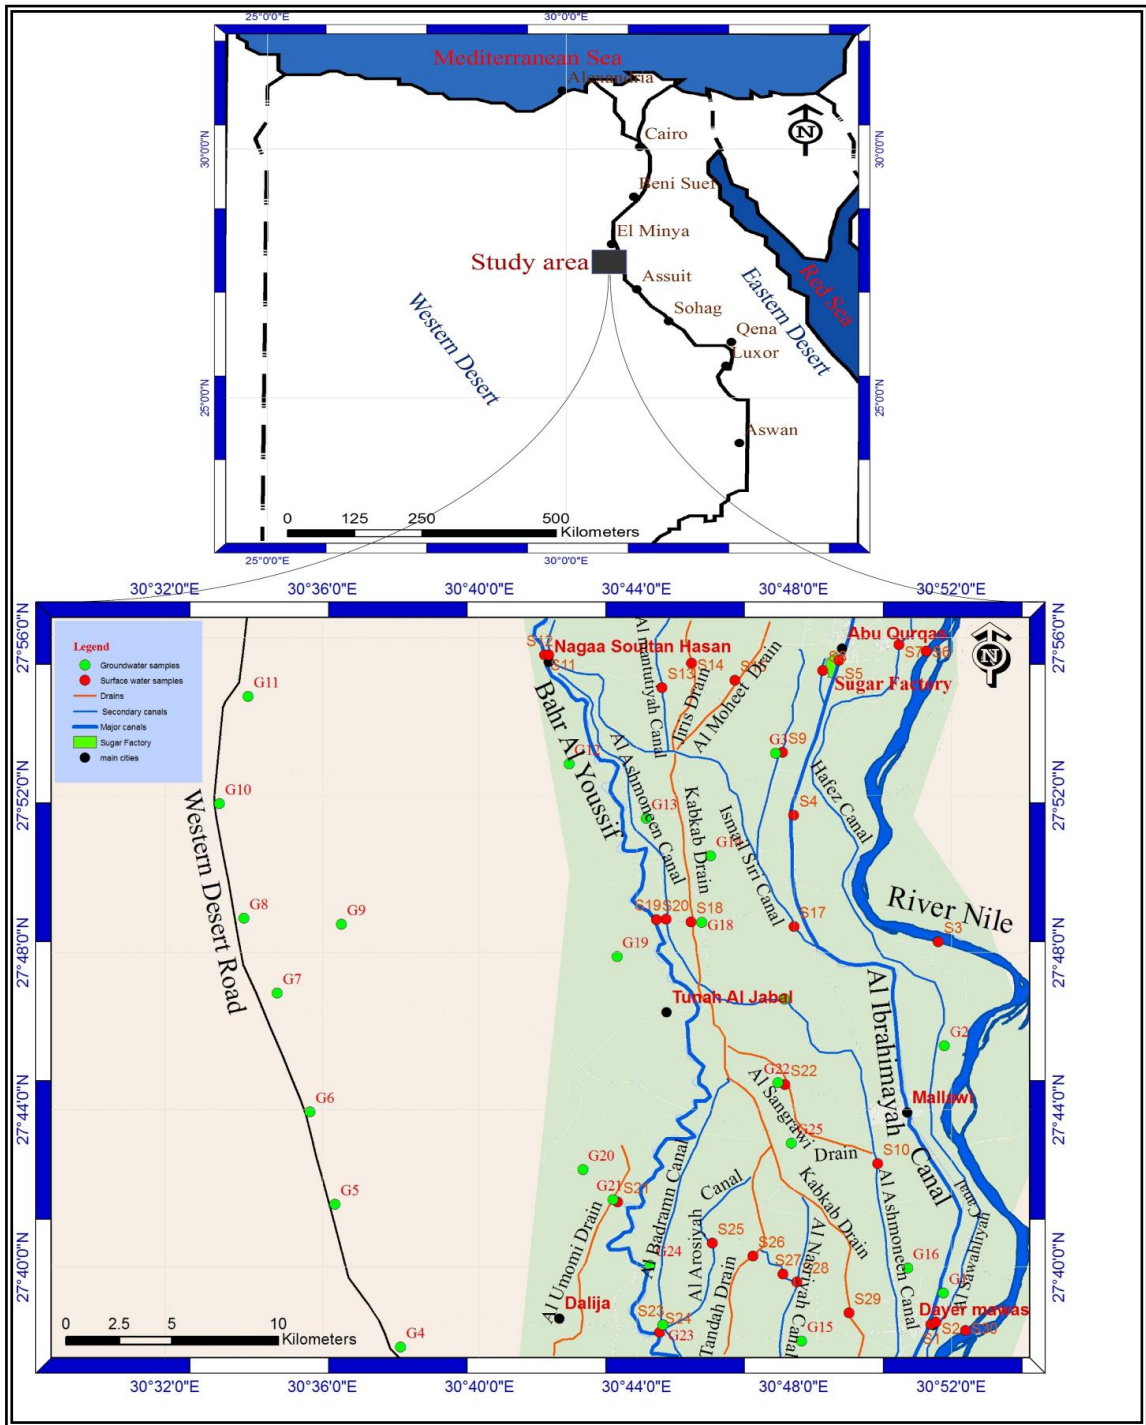

1 **Figure 1: Location map of the study area.**

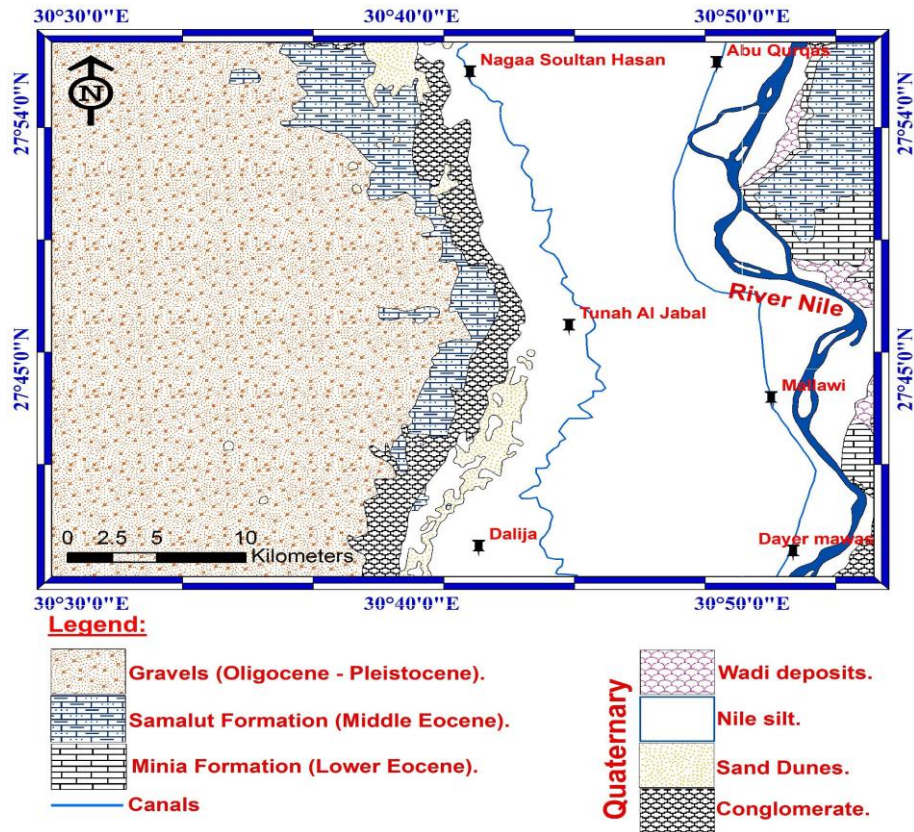

Figure 2: Geologic map of the study area.

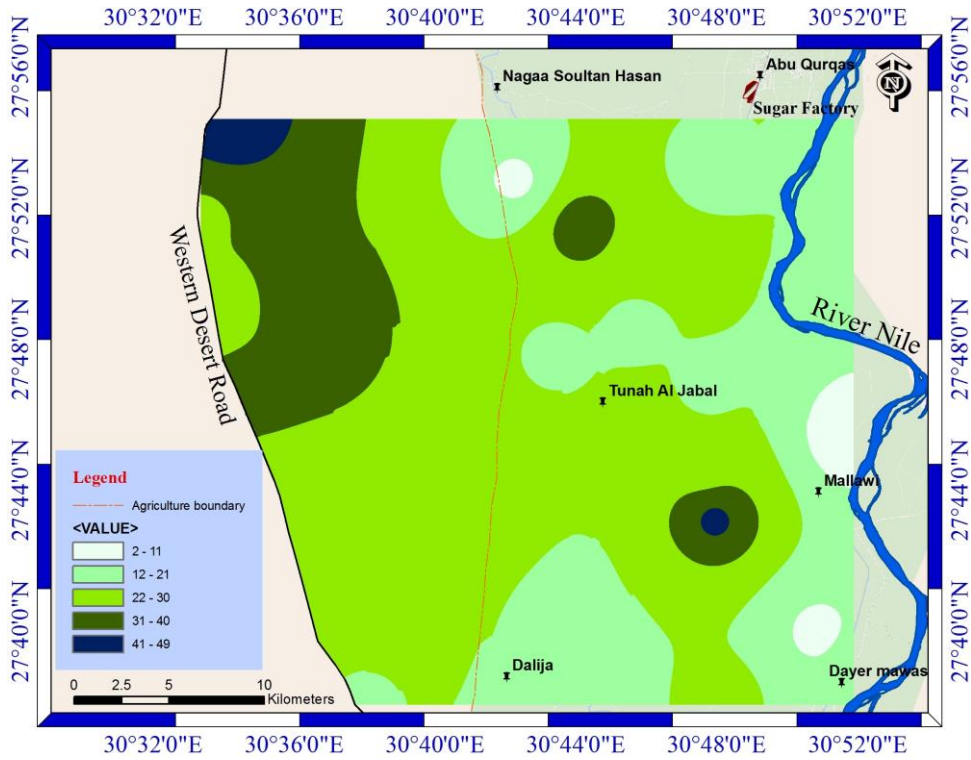

Figure 3: Spatial distribution map of Cd in the studied groundwater samples.

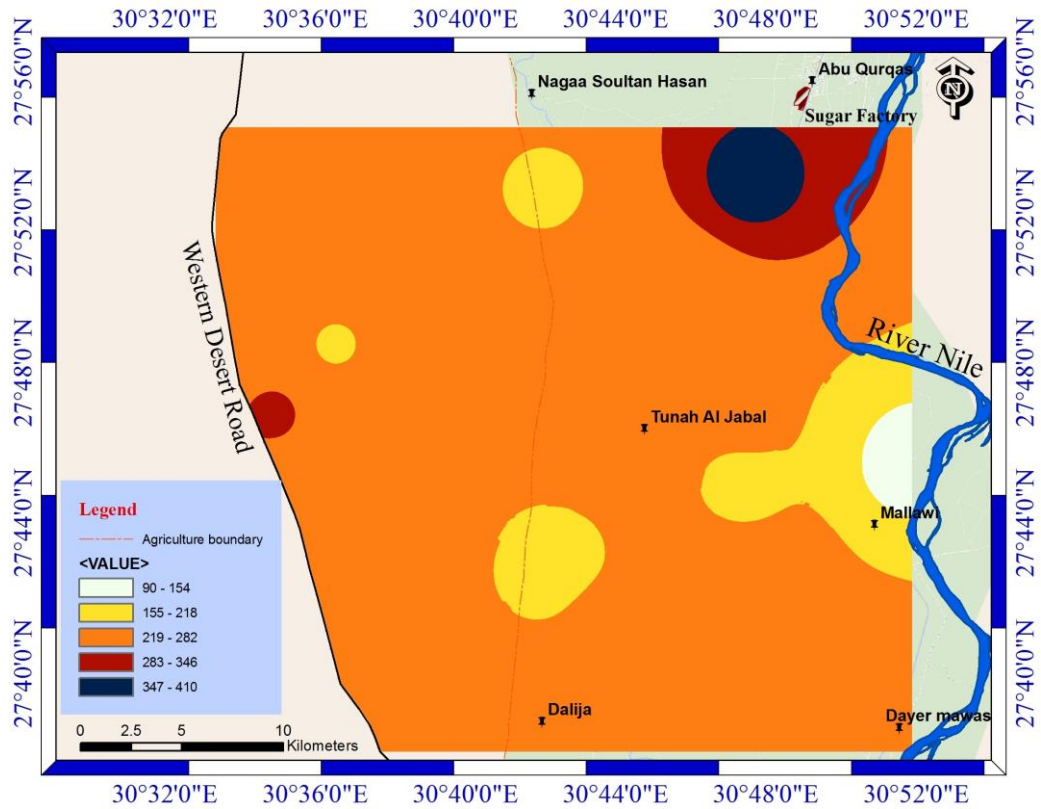

Figure 4: Spatial distribution map of Pb in the studied groundwater samples.

Table 1: Surface water samples and localities.

| Sample No.                                          | Water stream name    | Sample No.                        | Water stream name             |
|-----------------------------------------------------|----------------------|-----------------------------------|-------------------------------|
| S <sub>3</sub> , S <sub>6</sub> , S <sub>30</sub>   | River Nile           | S <sub>28</sub>                   | Al Nasriyah canal             |
| S <sub>1</sub> , S <sub>5</sub>                     | Al Ibrahimayah canal | S <sub>9</sub>                    | Branch from Ismail Siri canal |
| S <sub>11</sub> , S <sub>20</sub> , S <sub>24</sub> | Bahr Youssef         | S <sub>27</sub>                   | Branch from Al Nasriyah canal |
| S <sub>2</sub>                                      | Al Sawahliyah canal  | S <sub>4</sub>                    | Al Sellic Drain               |
| S <sub>7</sub>                                      | Hafez canal          | S <sub>14</sub>                   | Jiris Drain                   |
| S <sub>8</sub>                                      | Al ShiekhSharf canal | S <sub>15</sub>                   | Al Moheet Drain               |
| S <sub>10</sub> , S <sub>16</sub> , S <sub>19</sub> | Al Ashmoneen canal   | S <sub>18</sub> , S <sub>29</sub> | Kabkab Drain                  |
| S <sub>12</sub> , S <sub>17</sub>                   | Ismail Siri canal    | S <sub>21</sub>                   | Al umomi Drain                |
| S <sub>13</sub>                                     | Al Mantutiyah canal  | S <sub>22</sub>                   | Al Sangrawi Drain             |
| S <sub>23</sub>                                     | Al Badraman canal    | S <sub>26</sub>                   | Tandah Drain                  |
| S <sub>25</sub>                                     | Al Arosiyah canal    |                                   |                               |

**Table 2: Cd and Pb concentrations in the surface water samples (µg/l).**

| Sample No.      | Nile & Canals |     | Drains |     | Sample No.      | Nile & Canals |     | Drains |     |
|-----------------|---------------|-----|--------|-----|-----------------|---------------|-----|--------|-----|
|                 | Cd            | Pb  | Cd     | Pb  |                 | Cd            | Pb  | Cd     | Pb  |
| S <sub>1</sub>  | 39            | 184 | -      | -   | S <sub>18</sub> | -             | -   | 17     | 216 |
| S <sub>2</sub>  | 37            | 210 | -      | -   | S <sub>19</sub> | 15            | 208 | -      | -   |
| S <sub>3</sub>  | 22            | 270 | -      | -   | S <sub>20</sub> | 15            | 208 | -      | -   |
| S <sub>4</sub>  | -             | -   | 22     | 222 | S <sub>21</sub> | -             | -   | 28     | 183 |
| S <sub>5</sub>  | 19            | 241 | -      | -   | S <sub>22</sub> | -             | -   | 21     | 260 |
| S <sub>6</sub>  | 1             | 54  | -      | -   | S <sub>23</sub> | 33            | 275 | -      | -   |
| S <sub>7</sub>  | 19            | 96  | -      | -   | S <sub>24</sub> | 21            | 250 | -      | -   |
| S <sub>8</sub>  | 48            | 288 | -      | -   | S <sub>25</sub> | 7             | 272 | -      | -   |
| S <sub>9</sub>  | 9             | 209 | -      | -   | S <sub>26</sub> | -             | -   | 22     | 273 |
| S <sub>10</sub> | 20            | 222 | -      | -   | S <sub>27</sub> | 16            | 298 | -      | -   |
| S <sub>11</sub> | 19            | 268 | -      | -   | S <sub>28</sub> | 35            | 329 | -      | -   |
| S <sub>12</sub> | 43            | 262 | -      | -   | S <sub>29</sub> | -             | -   | 23     | 198 |
| S <sub>13</sub> | 28            | 303 | -      | -   | S <sub>30</sub> | 28            | 192 | -      | -   |
| S <sub>14</sub> | -             | -   | 42     | 234 | Mean            | 24            | 233 | 23     | 224 |
| S <sub>15</sub> | -             | -   | 12     | 213 | Median          | 21            | 245 | 22     | 219 |
| S <sub>16</sub> | 32            | 225 | -      | -   | Min.            | 1             | 54  | 12     | 183 |
| S <sub>17</sub> | 22            | 261 | -      | -   | Max.            | 48            | 329 | 42     | 273 |



**Table 3: Cd and Pb concentrations ( $\mu\text{g/l}$ ) in the study groundwater samples.**

| Sample No.      | Cd | Pb  | Sample No.      | Cd | Pb  |
|-----------------|----|-----|-----------------|----|-----|
| G <sub>1</sub>  | 15 | 249 | G <sub>15</sub> | 24 | 274 |
| G <sub>2</sub>  | 2  | 90  | G <sub>16</sub> | 8  | 242 |
| G <sub>3</sub>  | 19 | 410 | G <sub>17</sub> | 19 | 228 |
| G <sub>4</sub>  | 20 | 224 | G <sub>18</sub> | 19 | 228 |
| G <sub>5</sub>  | 26 | 252 | G <sub>19</sub> | 19 | 243 |
| G <sub>6</sub>  | 23 | 242 | G <sub>20</sub> | 28 | 162 |
| G <sub>7</sub>  | 36 | 296 | G <sub>21</sub> | 14 | 266 |
| G <sub>8</sub>  | 25 | 230 | G <sub>22</sub> | 27 | 193 |
| G <sub>9</sub>  | 39 | 213 | G <sub>23</sub> | 17 | 275 |
| G <sub>10</sub> | 29 | 229 | G <sub>24</sub> | 19 | 264 |
| G <sub>11</sub> | 49 | 254 | G <sub>25</sub> | 42 | 276 |
| G <sub>12</sub> | 9  | 197 | Mean            | 24 | 242 |
| G <sub>13</sub> | 38 | 270 | Minimum         | 2  | 90  |
| G <sub>14</sub> | 23 | 242 | Maximum         | 49 | 410 |

**Table 4: Statistical parameters of non-carcinogenic and carcinogenic health risks for surface water samples.**

| Parameter | HQ <sub>nc</sub> for Adults |                      | HQ <sub>nc</sub> for Children |                      |
|-----------|-----------------------------|----------------------|-------------------------------|----------------------|
|           | Cd                          | Pb                   | Cd                            | Pb                   |
| Minimum   | 0.05                        | 0.03                 | 0.08                          | 0.04                 |
| Maximum   | 2.06                        | 0.16                 | 3.95                          | 0.25                 |
| Average   | 1.30                        | 0.11                 | 1.96                          | 0.17                 |
| Parameter | HQ <sub>c</sub> for Adults  |                      | HQ <sub>c</sub> for Children  |                      |
|           | Cd                          | Pb                   | Cd                            | Pb                   |
| Minimum   | $0.17 \times 10^{-4}$       | $6.2 \times 10^{-3}$ | $0.1 \times 10^{-5}$          | $3.7 \times 10^{-2}$ |
| Maximum   | $7.9 \times 10^{-4}$        | $37 \times 10^{-3}$  | $4.8 \times 10^{-3}$          | $22 \times 10^{-2}$  |
| Average   | $3.9 \times 10^{-4}$        | $26 \times 10^{-3}$  | $2.3 \times 10^{-3}$          | $15 \times 10^{-2}$  |

**Table 5: Statistical parameters of non-carcinogenic and carcinogenic health risks for groundwater samples.**

| <b>Parameter</b> | <b>HQ<sub>nc</sub> for Adults</b> |           | <b>HQ<sub>nc</sub> for Children</b> |           |
|------------------|-----------------------------------|-----------|-------------------------------------|-----------|
|                  | <b>Cd</b>                         | <b>Pb</b> | <b>Cd</b>                           | <b>Pb</b> |
| <b>Minimum</b>   | 0.11                              | 0.04      | 0.16                                | 0.07      |
| <b>Maximum</b>   | 2.68                              | 0.20      | 4.03                                | 0.31      |
| <b>Average</b>   | 1.29                              | 0.12      | 1.94                                | 0.18      |

  

| <b>Parameter</b> | <b>HQ<sub>c</sub> for Adults</b> |                       | <b>HQ<sub>c</sub> for Children</b> |                       |
|------------------|----------------------------------|-----------------------|------------------------------------|-----------------------|
|                  | <b>Cd</b>                        | <b>Pb</b>             | <b>Cd</b>                          | <b>Pb</b>             |
| <b>Minimum</b>   | $4.8 \times 10^{-6}$             | $3.13 \times 10^{-5}$ | $2.9 \times 10^{-5}$               | $1.67 \times 10^{-9}$ |
| <b>Maximum</b>   | $1.2 \times 10^{-4}$             | $14.3 \times 10^{-5}$ | $7.11 \times 10^{-4}$              | $86.1 \times 10^{-5}$ |
| <b>Average</b>   | $5.66 \times 10^{-5}$            | $8.41 \times 10^{-5}$ | $3.42 \times 10^{-4}$              | $48.5 \times 10^{-5}$ |
